# Supplementary material for: Long-Term Grow-Out Affects Campylobacter jejuni Colonization Fitness in Coincidence With Altered Microbiota and Lipid Composition in the Cecum of Laying Hens
Source: Front Vet Sci. 2021 Jun 18;8:675570. doi: 10.3389/fvets.2021.675570 (PMC8249580; doi:10.3389/fvets.2021.675570)
Supplement: Supplementary file 3 [file Data_Sheet_2.XLSX]

## Sheet: Sheet1
Table Sx. Summary of 16S rRNA gene sequencing data filtering and statistical index.
Sample	No. of reads	Avg.length	No. of reads after filtering	Percentage filtered (%)	Avg.length after trim	Shannon diversity index	Simpson index
0W-1	322178	232.67	227105	70.49	307.53	3.71	0.08
0W-2	333238	233.79	235614	70.7	308.59	3.67	0.09
0W-3	287877	245.57	220434	76.57	303.46	3.94	0.07
2W-1	290575	228.75	202999	69.86	304.3	3.61	0.07
2W-2	249965	268.54	207335	82.95	311.43	3.4	0.11
2W-3	320206	231.54	227571	71.07	304.16	4.19	0.04
8W-1	323732	234.77	234675	72.49	303.02	4.31	0.04
8W-2	288334	252.83	227577	78.93	304.61	3.78	0.09
8W-3	258177	254.43	203627	78.87	307	3.43	0.1
16W-1	261919	254.98	211231	80.65	301.37	4.95	0.02
16W-2	316909	227.58	230338	72.68	291.28	4.57	0.03
16W-3	288186	223.63	197880	68.66	300.37	4.77	0.02
24W-1	305089	225.52	221700	72.67	287.63	4.88	0.02
24W-2	270855	233.32	197979	73.09	297.82	4.83	0.02
24W-3	263335	223	186090	70.67	292.09	4.6	0.03
32W-1	259938	230.58	186304	71.67	299.16	4.83	0.02
32W-2	236736	217.14	165037	69.71	285.84	4.82	0.02
32W-3	242537	234.68	176213	72.65	301.99	4.17	0.05
40W-1	249283	238.08	184814	74.14	301.01	4.83	0.02
40W-2	217473	229.93	160209	73.67	291	4.85	0.02
40W-3	228356	226.65	164706	72.13	292.09	4.81	0.02
